# Supplementary material for: Pollinator and host sharing lead to hybridization and introgression in Panamanian free‐standing figs, but not in their pollinator wasps
Source: PubMed Central journal article supplement (PMC9848820; doi:10.1002/ece3.9673), 2023-01-18
Supplement: ECE3-13-e9673-s001.pdf [file ECE3-13-e9673-s001.pdf]

Supplemental Information for:

**Pollinator and host sharing lead to  
hybridization and introgression in  
Panamanian free-standing figs, but not in  
their pollinator wasps**

Jordan D. Satler, Edward Allen Herre, Tracy A. Heath, Carlos A. Machado,  
Adalberto Gómez Zúñiga, K. Charlotte Jandér, Deren A. R. Eaton, and John D. Nason

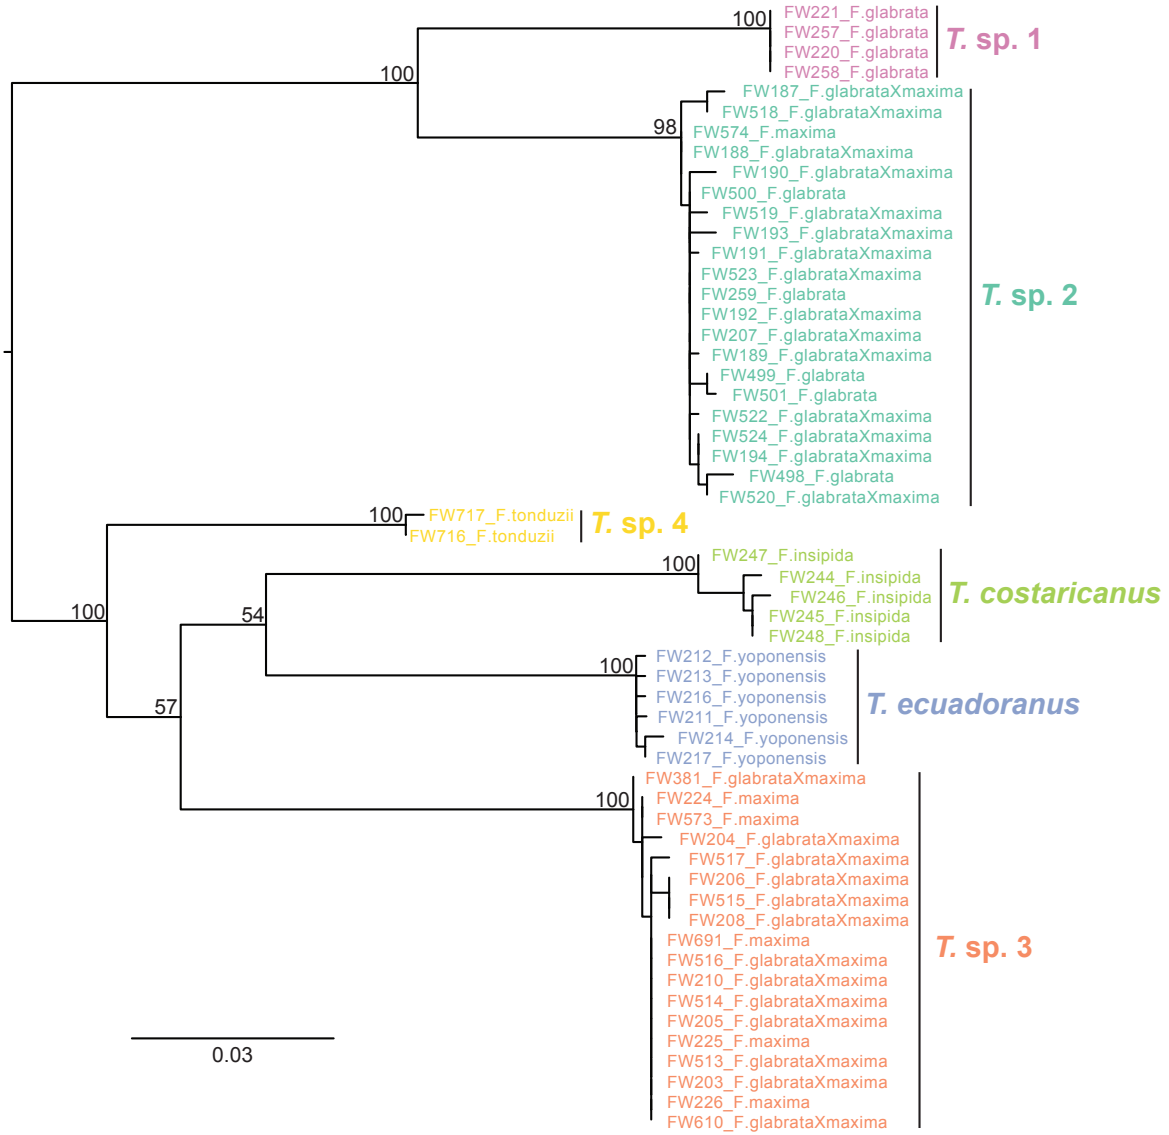

Figure S1: Maximum likelihood gene tree estimate of *Tetrapus* wasp COI data obtained from UCE sequencing. Nodal support values represent bootstrap support. Individuals are labeled with their unique identifier (FW#) and the host species from which they were sampled. The tree was midpoint rooted for visual purposes.

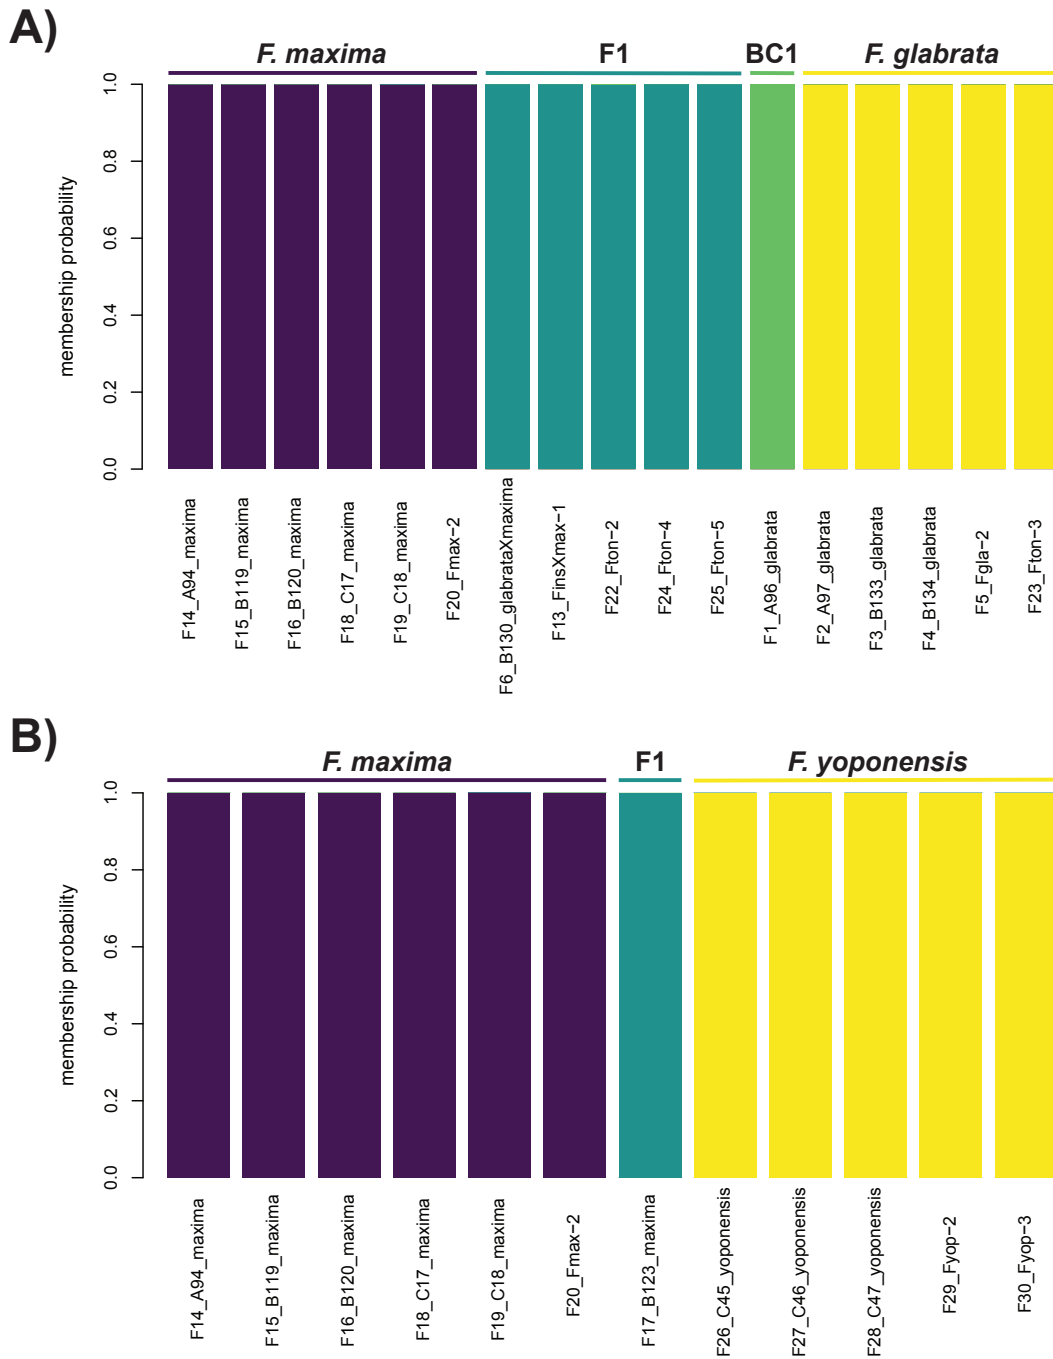

Figure S2: Hybrid analyses with snapclust. Panel A shows hybrids identified between *F. glabrata* and *F. maxima*, including five F1s and one first-generation backcross (BC1) to *F. glabrata*. Panel B shows an F1 hybrid identified between *F. maxima* and *F. yoponensis*. Individuals are labeled with their unique identifier (F#) and internal sampling code.

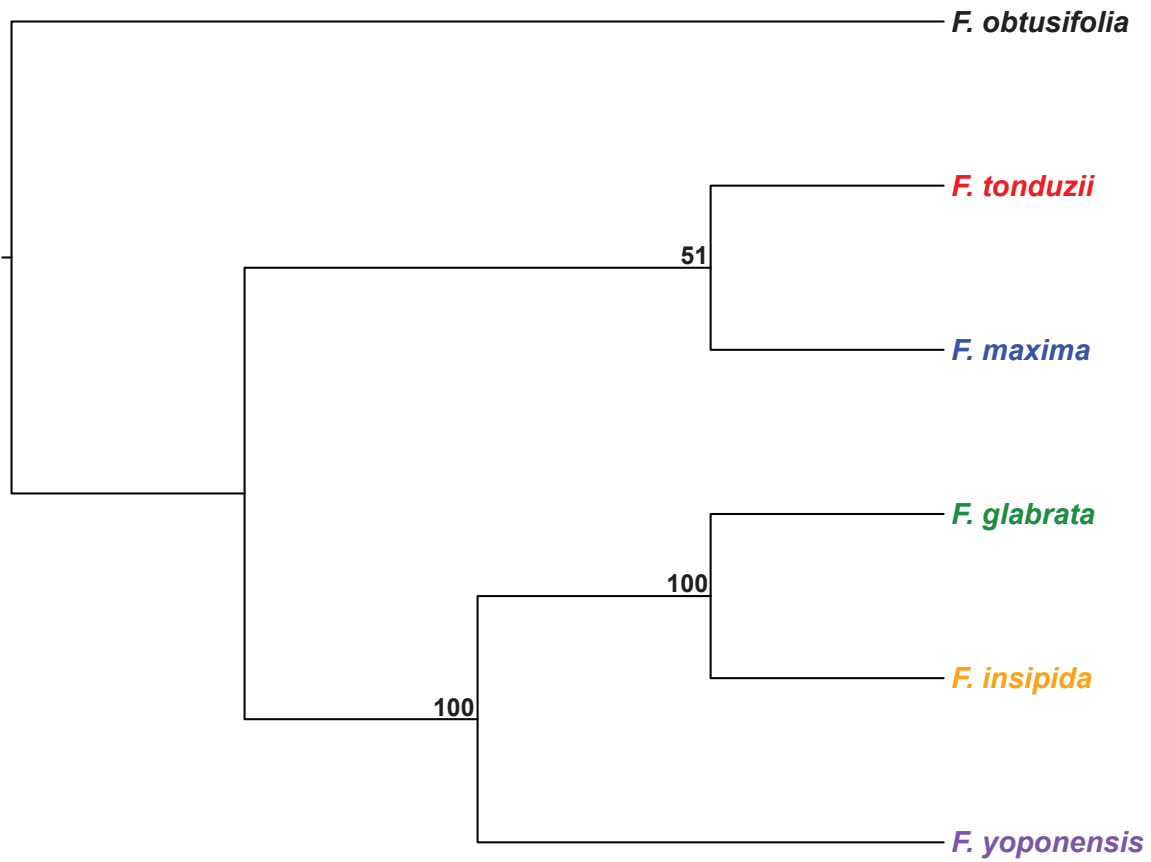

Figure S3: Species tree analysis with SVDQuartets of the *Pharmacosycea* figs. Nodal support values represent bootstrap support.

| Individual | Pollinator Wasp              | Sampled Host Fig                      | BioSample    |
|------------|------------------------------|---------------------------------------|--------------|
| FW187      | <i>Tetrapus</i> sp. 2        | <i>Ficus glabrata</i> X <i>maxima</i> | SAMN31644000 |
| FW188      | <i>Tetrapus</i> sp. 2        | <i>Ficus glabrata</i> X <i>maxima</i> | SAMN31644001 |
| FW189      | <i>Tetrapus</i> sp. 2        | <i>Ficus glabrata</i> X <i>maxima</i> | SAMN31644002 |
| FW190      | <i>Tetrapus</i> sp. 2        | <i>Ficus glabrata</i> X <i>maxima</i> | SAMN31644003 |
| FW191      | <i>Tetrapus</i> sp. 2        | <i>Ficus glabrata</i> X <i>maxima</i> | SAMN31644004 |
| FW192      | <i>Tetrapus</i> sp. 2        | <i>Ficus glabrata</i> X <i>maxima</i> | SAMN31644005 |
| FW193      | <i>Tetrapus</i> sp. 2        | <i>Ficus glabrata</i> X <i>maxima</i> | SAMN31644006 |
| FW194      | <i>Tetrapus</i> sp. 2        | <i>Ficus glabrata</i> X <i>maxima</i> | SAMN31644007 |
| FW203      | <i>Tetrapus</i> sp. 3        | <i>Ficus glabrata</i> X <i>maxima</i> | SAMN31644008 |
| FW204      | <i>Tetrapus</i> sp. 3        | <i>Ficus glabrata</i> X <i>maxima</i> | SAMN31644009 |
| FW205      | <i>Tetrapus</i> sp. 3        | <i>Ficus glabrata</i> X <i>maxima</i> | SAMN31644010 |
| FW206      | <i>Tetrapus</i> sp. 3        | <i>Ficus glabrata</i> X <i>maxima</i> | SAMN31644011 |
| FW207      | <i>Tetrapus</i> sp. 2        | <i>Ficus glabrata</i> X <i>maxima</i> | SAMN31644012 |
| FW208      | <i>Tetrapus</i> sp. 3        | <i>Ficus glabrata</i> X <i>maxima</i> | SAMN31644013 |
| FW210      | <i>Tetrapus</i> sp. 3        | <i>Ficus glabrata</i> X <i>maxima</i> | SAMN31644014 |
| FW211      | <i>Tetrapus ecuadoranus</i>  | <i>Ficus yoponensis</i>               | SAMN31644015 |
| FW212      | <i>Tetrapus ecuadoranus</i>  | <i>Ficus yoponensis</i>               | SAMN31644016 |
| FW213      | <i>Tetrapus ecuadoranus</i>  | <i>Ficus yoponensis</i>               | SAMN31644017 |
| FW214      | <i>Tetrapus ecuadoranus</i>  | <i>Ficus yoponensis</i>               | SAMN31644018 |
| FW216      | <i>Tetrapus ecuadoranus</i>  | <i>Ficus yoponensis</i>               | SAMN31644019 |
| FW217      | <i>Tetrapus ecuadoranus</i>  | <i>Ficus yoponensis</i>               | SAMN31644020 |
| FW220      | <i>Tetrapus</i> sp. 1        | <i>Ficus glabrata</i>                 | SAMN31644021 |
| FW221      | <i>Tetrapus</i> sp. 1        | <i>Ficus glabrata</i>                 | SAMN31644022 |
| FW224      | <i>Tetrapus</i> sp. 3        | <i>Ficus maxima</i>                   | SAMN31644023 |
| FW225      | <i>Tetrapus</i> sp. 3        | <i>Ficus maxima</i>                   | SAMN31644024 |
| FW226      | <i>Tetrapus</i> sp. 3        | <i>Ficus maxima</i>                   | SAMN31644025 |
| FW244      | <i>Tetrapus costaricanus</i> | <i>Ficus insipida</i>                 | SAMN31644026 |
| FW245      | <i>Tetrapus costaricanus</i> | <i>Ficus insipida</i>                 | SAMN31644027 |
| FW246      | <i>Tetrapus costaricanus</i> | <i>Ficus insipida</i>                 | SAMN31644028 |
| FW247      | <i>Tetrapus costaricanus</i> | <i>Ficus insipida</i>                 | SAMN31644029 |
| FW248      | <i>Tetrapus costaricanus</i> | <i>Ficus insipida</i>                 | SAMN31644030 |
| FW257      | <i>Tetrapus</i> sp. 1        | <i>Ficus glabrata</i>                 | SAMN31644031 |
| FW258      | <i>Tetrapus</i> sp. 1        | <i>Ficus glabrata</i>                 | SAMN31644032 |
| FW259      | <i>Tetrapus</i> sp. 2        | <i>Ficus glabrata</i>                 | SAMN31644033 |
| FW381      | <i>Tetrapus</i> sp. 3        | <i>Ficus glabrata</i> X <i>maxima</i> | SAMN31644034 |
| FW498      | <i>Tetrapus</i> sp. 2        | <i>Ficus glabrata</i>                 | SAMN31644035 |
| FW499      | <i>Tetrapus</i> sp. 2        | <i>Ficus glabrata</i>                 | SAMN31644036 |
| FW500      | <i>Tetrapus</i> sp. 2        | <i>Ficus glabrata</i>                 | SAMN31644037 |
| FW501      | <i>Tetrapus</i> sp. 2        | <i>Ficus glabrata</i>                 | SAMN31644038 |
| FW513      | <i>Tetrapus</i> sp. 3        | <i>Ficus glabrata</i> X <i>maxima</i> | SAMN31644039 |
| FW514      | <i>Tetrapus</i> sp. 3        | <i>Ficus glabrata</i> X <i>maxima</i> | SAMN31644040 |

|       |                       |                                       |              |
|-------|-----------------------|---------------------------------------|--------------|
| FW515 | <i>Tetrapus</i> sp. 3 | <i>Ficus glabrata</i> X <i>maxima</i> | SAMN31644041 |
| FW516 | <i>Tetrapus</i> sp. 3 | <i>Ficus glabrata</i> X <i>maxima</i> | SAMN31644042 |
| FW517 | <i>Tetrapus</i> sp. 3 | <i>Ficus glabrata</i> X <i>maxima</i> | SAMN31644043 |
| FW518 | <i>Tetrapus</i> sp. 2 | <i>Ficus glabrata</i> X <i>maxima</i> | SAMN31644044 |
| FW519 | <i>Tetrapus</i> sp. 2 | <i>Ficus glabrata</i> X <i>maxima</i> | SAMN31644045 |
| FW520 | <i>Tetrapus</i> sp. 2 | <i>Ficus glabrata</i> X <i>maxima</i> | SAMN31644046 |
| FW521 | <i>Tetrapus</i> sp. 2 | <i>Ficus glabrata</i> X <i>maxima</i> | SAMN31644047 |
| FW522 | <i>Tetrapus</i> sp. 2 | <i>Ficus glabrata</i> X <i>maxima</i> | SAMN31644048 |
| FW523 | <i>Tetrapus</i> sp. 2 | <i>Ficus glabrata</i> X <i>maxima</i> | SAMN31644049 |
| FW524 | <i>Tetrapus</i> sp. 2 | <i>Ficus glabrata</i> X <i>maxima</i> | SAMN31644050 |
| FW573 | <i>Tetrapus</i> sp. 3 | <i>Ficus maxima</i>                   | SAMN31644051 |
| FW574 | <i>Tetrapus</i> sp. 2 | <i>Ficus maxima</i>                   | SAMN31644052 |
| FW610 | <i>Tetrapus</i> sp. 3 | <i>Ficus glabrata</i> X <i>maxima</i> | SAMN31644053 |
| FW691 | <i>Tetrapus</i> sp. 3 | <i>Ficus maxima</i>                   | SAMN31644054 |
| FW716 | <i>Tetrapus</i> sp. 4 | <i>Ficus tonduzii</i>                 | SAMN31644055 |
| FW717 | <i>Tetrapus</i> sp. 4 | <i>Ficus tonduzii</i>                 | SAMN31644056 |

Table S1: Pollinator wasp sampling. Information includes unique individual identifier (FW#), pollinator wasp species, sampled host fig species, and NCBI BioSample accession number.

| Individual | Sampled Host Fig                        | BioSample    |
|------------|-----------------------------------------|--------------|
| F1         | <i>Ficus glabrata</i> X <i>maxima</i>   | SAMN31644057 |
| F2         | <i>Ficus glabrata</i>                   | SAMN31644058 |
| F3         | <i>Ficus glabrata</i>                   | SAMN31644059 |
| F4         | <i>Ficus glabrata</i>                   | SAMN31644060 |
| F5         | <i>Ficus glabrata</i>                   | SAMN31644061 |
| F6         | <i>Ficus glabrata</i> X <i>maxima</i>   | SAMN31644062 |
| F7         | <i>Ficus insipida</i>                   | SAMN31644063 |
| F8         | <i>Ficus insipida</i>                   | SAMN31644064 |
| F9         | <i>Ficus insipida</i>                   | SAMN31644065 |
| F10        | <i>Ficus insipida</i>                   | SAMN31644066 |
| F11        | <i>Ficus insipida</i>                   | SAMN31644067 |
| F12        | <i>Ficus insipida</i>                   | SAMN31644068 |
| F13        | <i>Ficus glabrata</i> X <i>maxima</i>   | SAMN31644069 |
| F14        | <i>Ficus maxima</i>                     | SAMN31644070 |
| F15        | <i>Ficus maxima</i>                     | SAMN31644071 |
| F16        | <i>Ficus maxima</i>                     | SAMN31644072 |
| F17        | <i>Ficus maxima</i> X <i>yoponensis</i> | SAMN31644073 |
| F18        | <i>Ficus maxima</i>                     | SAMN31644074 |
| F19        | <i>Ficus maxima</i>                     | SAMN31644075 |
| F20        | <i>Ficus maxima</i>                     | SAMN31644076 |
| F21        | <i>Ficus tonduzii</i>                   | SAMN31644077 |
| F22        | <i>Ficus glabrata</i> X <i>maxima</i>   | SAMN31644078 |
| F23        | <i>Ficus glabrata</i>                   | SAMN31644079 |
| F24        | <i>Ficus glabrata</i> X <i>maxima</i>   | SAMN31644080 |
| F25        | <i>Ficus glabrata</i> X <i>maxima</i>   | SAMN31644081 |
| F26        | <i>Ficus yoponensis</i>                 | SAMN31644082 |
| F27        | <i>Ficus yoponensis</i>                 | SAMN31644083 |
| F28        | <i>Ficus yoponensis</i>                 | SAMN31644084 |
| F29        | <i>Ficus yoponensis</i>                 | SAMN31644085 |
| F30        | <i>Ficus yoponensis</i>                 | SAMN31644086 |

Table S2: Host fig sampling. Information includes unique individual identifier (F#), host fig species, and NCBI BioSample accession number.

| Individual | Pollinator Wasp              | Raw Reads | Contigs | Loci |
|------------|------------------------------|-----------|---------|------|
| FW220      | <i>Tetrapus</i> sp. 1        | 4687114   | 238899  | 1560 |
| FW221      | <i>Tetrapus</i> sp. 1        | 4761416   | 215821  | 1549 |
| FW257      | <i>Tetrapus</i> sp. 1        | 4185059   | 215301  | 1547 |
| FW258      | <i>Tetrapus</i> sp. 1        | 3228608   | 155607  | 1481 |
| FW187      | <i>Tetrapus</i> sp. 2        | 3568557   | 169184  | 1504 |
| FW188      | <i>Tetrapus</i> sp. 2        | 5395745   | 252736  | 1629 |
| FW189      | <i>Tetrapus</i> sp. 2        | 2952646   | 150594  | 1462 |
| FW190      | <i>Tetrapus</i> sp. 2        | 3359756   | 170233  | 1547 |
| FW191      | <i>Tetrapus</i> sp. 2        | 4498239   | 219901  | 1612 |
| FW192      | <i>Tetrapus</i> sp. 2        | 2595606   | 125815  | 1441 |
| FW193      | <i>Tetrapus</i> sp. 2        | 4454112   | 216000  | 1572 |
| FW194      | <i>Tetrapus</i> sp. 2        | 3419353   | 169235  | 1511 |
| FW207      | <i>Tetrapus</i> sp. 2        | 2538297   | 140069  | 1458 |
| FW259      | <i>Tetrapus</i> sp. 2        | 3038800   | 161362  | 1451 |
| FW498      | <i>Tetrapus</i> sp. 2        | 1945324   | 97408   | 1333 |
| FW499      | <i>Tetrapus</i> sp. 2        | 1870326   | 89661   | 1338 |
| FW500      | <i>Tetrapus</i> sp. 2        | 2210143   | 115297  | 1386 |
| FW501      | <i>Tetrapus</i> sp. 2        | 2368081   | 128566  | 1399 |
| FW518      | <i>Tetrapus</i> sp. 2        | 2568465   | 147908  | 1484 |
| FW519      | <i>Tetrapus</i> sp. 2        | 2205107   | 117843  | 1463 |
| FW520      | <i>Tetrapus</i> sp. 2        | 1510105   | 72769   | 1301 |
| FW521      | <i>Tetrapus</i> sp. 2        | 1471472   | 66184   | 1260 |
| FW522      | <i>Tetrapus</i> sp. 2        | 1747608   | 85640   | 1298 |
| FW523      | <i>Tetrapus</i> sp. 2        | 1818483   | 92336   | 1323 |
| FW524      | <i>Tetrapus</i> sp. 2        | 1719095   | 78653   | 1298 |
| FW574      | <i>Tetrapus</i> sp. 2        | 1605183   | 78770   | 1321 |
| FW244      | <i>Tetrapus costaricanus</i> | 3135303   | 145513  | 1409 |
| FW245      | <i>Tetrapus costaricanus</i> | 4301642   | 194341  | 1440 |
| FW246      | <i>Tetrapus costaricanus</i> | 4520791   | 211143  | 1471 |
| FW247      | <i>Tetrapus costaricanus</i> | 2918422   | 132518  | 1356 |
| FW248      | <i>Tetrapus costaricanus</i> | 5135872   | 247608  | 1531 |
| FW203      | <i>Tetrapus</i> sp. 3        | 1490824   | 62516   | 1295 |
| FW204      | <i>Tetrapus</i> sp. 3        | 1680263   | 78249   | 1315 |
| FW205      | <i>Tetrapus</i> sp. 3        | 1746078   | 84054   | 1308 |
| FW206      | <i>Tetrapus</i> sp. 3        | 1657271   | 74874   | 1270 |
| FW208      | <i>Tetrapus</i> sp. 3        | 1410770   | 58561   | 1244 |
| FW210      | <i>Tetrapus</i> sp. 3        | 2069568   | 106515  | 1360 |
| FW224      | <i>Tetrapus</i> sp. 3        | 3025803   | 146263  | 1428 |
| FW225      | <i>Tetrapus</i> sp. 3        | 4063502   | 205176  | 1549 |
| FW226      | <i>Tetrapus</i> sp. 3        | 3968433   | 201191  | 1509 |
| FW381      | <i>Tetrapus</i> sp. 3        | 2141143   | 105894  | 1334 |



|       |                             |         |        |      |
|-------|-----------------------------|---------|--------|------|
| FW513 | <i>Tetrapus</i> sp. 3       | 2335878 | 122856 | 1414 |
| FW514 | <i>Tetrapus</i> sp. 3       | 864467  | 5561   | 650  |
| FW515 | <i>Tetrapus</i> sp. 3       | 1434738 | 59929  | 1303 |
| FW516 | <i>Tetrapus</i> sp. 3       | 1628628 | 72400  | 1308 |
| FW517 | <i>Tetrapus</i> sp. 3       | 2079692 | 104920 | 1373 |
| FW573 | <i>Tetrapus</i> sp. 3       | 2384204 | 124031 | 1383 |
| FW610 | <i>Tetrapus</i> sp. 3       | 8810987 | 331314 | 1607 |
| FW691 | <i>Tetrapus</i> sp. 3       | 3568872 | 196911 | 1467 |
| FW716 | <i>Tetrapus</i> sp. 4       | 7259025 | 314992 | 1655 |
| FW717 | <i>Tetrapus</i> sp. 4       | 3560025 | 191594 | 1432 |
| FW211 | <i>Tetrapus ecuadoranus</i> | 3474554 | 189134 | 1508 |
| FW212 | <i>Tetrapus ecuadoranus</i> | 6117746 | 320937 | 1643 |
| FW213 | <i>Tetrapus ecuadoranus</i> | 6353427 | 320962 | 1611 |
| FW214 | <i>Tetrapus ecuadoranus</i> | 3144128 | 162576 | 1454 |
| FW216 | <i>Tetrapus ecuadoranus</i> | 2816255 | 146790 | 1360 |
| FW217 | <i>Tetrapus ecuadoranus</i> | 5795350 | 307336 | 1579 |

Table S3: Pollinator wasp sequencing. Information includes unique individual identifier (FW#), pollinator wasp species, number of raw sequence reads, number of Trinity contigs, and number of UCE loci.

| Individual | Host Fig                                | Raw Reads | Clusters | Loci  |
|------------|-----------------------------------------|-----------|----------|-------|
| F1         | <i>Ficus glabrata</i> X <i>maxima</i>   | 7244559   | 176519   | 32601 |
| F2         | <i>Ficus glabrata</i>                   | 4887963   | 165416   | 24792 |
| F3         | <i>Ficus glabrata</i>                   | 4214450   | 63549    | 34655 |
| F4         | <i>Ficus glabrata</i>                   | 7119332   | 72796    | 36369 |
| F5         | <i>Ficus glabrata</i>                   | 2583903   | 60137    | 20939 |
| F6         | <i>Ficus glabrata</i> X <i>maxima</i>   | 4060762   | 67775    | 35566 |
| F7         | <i>Ficus insipida</i>                   | 1003795   | 44201    | 16507 |
| F8         | <i>Ficus insipida</i>                   | 7909847   | 76907    | 36970 |
| F9         | <i>Ficus insipida</i>                   | 2017468   | 50610    | 29427 |
| F10        | <i>Ficus insipida</i>                   | 6030721   | 74683    | 36611 |
| F11        | <i>Ficus insipida</i>                   | 6928368   | 67783    | 36858 |
| F12        | <i>Ficus insipida</i>                   | 7347462   | 77847    | 37166 |
| F13        | <i>Ficus glabrata</i> X <i>maxima</i>   | 1772506   | 36250    | 16900 |
| F14        | <i>Ficus maxima</i>                     | 2082861   | 53092    | 29079 |
| F15        | <i>Ficus maxima</i>                     | 2054747   | 63114    | 27703 |
| F16        | <i>Ficus maxima</i>                     | 2311959   | 57340    | 31056 |
| F17        | <i>Ficus maxima</i> X <i>yoponensis</i> | 1547830   | 47958    | 23657 |
| F18        | <i>Ficus maxima</i>                     | 24089307  | 93134    | 37423 |
| F19        | <i>Ficus maxima</i>                     | 15711473  | 81113    | 37464 |
| F20        | <i>Ficus maxima</i>                     | 1917990   | 40238    | 17481 |
| F21        | <i>Ficus tonduzii</i>                   | 20840966  | 116802   | 36924 |
| F22        | <i>Ficus glabrata</i> X <i>maxima</i>   | 15431214  | 86425    | 37364 |
| F23        | <i>Ficus glabrata</i>                   | 19882495  | 92835    | 37502 |
| F24        | <i>Ficus glabrata</i> X <i>maxima</i>   | 17770360  | 95279    | 37868 |
| F25        | <i>Ficus glabrata</i> X <i>maxima</i>   | 1947746   | 37936    | 18174 |
| F26        | <i>Ficus yoponensis</i>                 | 25289469  | 97790    | 37606 |
| F27        | <i>Ficus yoponensis</i>                 | 17247374  | 84773    | 37546 |
| F28        | <i>Ficus yoponensis</i>                 | 10196819  | 74354    | 37302 |
| F29        | <i>Ficus yoponensis</i>                 | 10046758  | 70781    | 35725 |
| F30        | <i>Ficus yoponensis</i>                 | 12440898  | 78933    | 36314 |

Table S4: Host fig sequencing. Information includes unique individual identifier (F#), host fig species, number of raw sequence reads, number of RAD clusters, and number of RAD loci when requiring at least 50% sampling presence.
